# Supplementary material for: Genetically engineered probiotic for the treatment of phenylketonuria (PKU); assessment of a novel treatment in vitro and in the PAHenu2 mouse model of PKU
Source: PubMed Central journal article supplement (PMC5435137; doi:10.1371/journal.pone.0176286), 2017-05-17
Supplement: pone.0176286.s001.pdf [file pone.0176286.s001.pdf]

FuzErmAvPAL, forward orientation

```
1 GCATGCTAGC TATAGTTCTA GAGGATACCT GGTTGATTAA CGTTAGCCTG GCTACGTATA
61 CTCCTGGAAG TATTAATAGA CGACCTAGGA TGCATATGTT CAAGAGTGTG TTGATAGTGC
121 AGTATCTTAA AATTTTGTAT AATAGGAATT GAAGTTAAAT TAGATGCTAA AAATTTGTAA
181 TTAAGAAGGA GTAGGTATAA ATGAAGACTT TATCTCAAGC ACAATCTAAG ACTAGTTCTC
241 AACAAATCTC ATTTACTGGA AACTCAAGTG CTAATGTTAT CATTGGTAAT CAAAAGCTTA
301 CTATTAACGA TGTTGCACGG GTTGCACGCA ATGGTACTTT AGTTAGTTTA ACTAACAAACA
361 CTGACATTTT ACAAGGCATT CAAGCTAGTT GCGACTATAT CAATAACGCT GTTGAATCAG
421 GAGAACCAAT TTATGGTGTG ACTTCAGGAT TCGGTGGAAT GGCAAACGTC GCTATTAGTC
481 GTGAACAAGC TTCTGAACTT CAAACTAATC TTGTTTGGTT TCTTAAAACA GGAGCTGGTA
541 ATAAACTTCC ATTAGCAGAT GTTCGTGCTG CTATGTTATT ACGTGCAAAT TCACACATGC
601 GTGGCGCTTC TGGTATTCGT CTTGAATTAA TTAAGCGTAT GGAAATTTTC CTTAACGCCG
661 GTGTTACACC TTATGTTTAC GAATTCGGAT CAATTGGTGC AAGTGGAGAT CTTGTTCCCTT
721 TATCTTATAT TACAGGTTCT TTAATTGGTT TGGATCCATC ATTCAAAGTT GATTTTAATG
781 GTAAAGAAAT GGATGCCCCA ACAGCTCTTC GACAATTAAA TTTATCACCA CTTACATTAC
841 TTCCAAAAGA AGGTCTTGCT ATGATGAATG GTACATCAGT TATGACGGGA ATTGCTGCTA
901 ATTGCGTTTA TGATACTCAA ATTCCTACTG CTATTGCCAT GGGTGTTCAT GCCTTAGATA
961 TTCAAGCACT TAATGGCACA AATCAAAGTT TCCACCCATT CATTCACAAT TCTAACCTC
1021 ACCCAGGTCA ACTTTGGGCT GCTGATCAAA TGATTTCTCT TTTAGCTAAT AGTCAACTTG
1081 TTCGCGACGA ATTAGATGGT AAGCATGATT ATCGTGATCA TGAACCTATT CAAGACCGCT
1141 ATAGTTTACG TTGCTTACCA CAATATTTGG GTCCTATTGT TGATGGAATT TCACAAATTG
1201 CTAAGCAAAT TGAAATCGAA ATTAATAGTG TCACTGACAA TCCATTAATT GACGTTGATA
1261 ACCAAGCCTC ATACCATGGC GGTAACTTTT TGGGTCAATA TGTTGGCATG GGCATGGACC
1321 ACTTACGTTA CTACATTGGT CTTCTTGCAA AGCATTTGGA TGTCCAAATT GCACTTTTGG
1381 CCAGTCCAGA ATTCAGTAAC GGACTTCCAC CATCATTATT GGGAAACCGG GAACGAAAGG
1441 TAAACATGGG TCTTAAGGGT TTGCAAATTT GTGGCAACTC AATTATGCCA TTGTTGACTT
1501 TTTACGAAA TTCAATTGCT GATCGCTTTC CTACACACGC CGAACAATTT AACCAAATA
1561 TTAACTCTCA AGGATACACT TCTGCTACGT TAGCACGACG GTCTGTTGAT ATTTTTCAAA
1621 ACTACGTAGC TATTGCATTA ATGTTTGGAG TACAAGCTGT TGATTTACGG ACTTACAAA
1681 AGACGGGCCA TTATGATGCT CGTGCTTGTT TAAGTCCAGC TACAGAACGT CTTTATTCAG
1741 CAGTACGTCA TGTTGTTCGGC CAAAAACCTA CATCAGATCG GCCATATATT TGGAACGATA
1801 ACGAACAAAG ACTTGACGAA CATATTGCTC GTATTTCTGC TGATATCGCT GCTGGTGGTG
1861 TAATTGTTCA AGCCGTACAA GATATCCTTC CTTGTTTACA CTAATAATGA TAAGTTAAGG
1921 GGTGCATAAA CTGCATCCCT TAACTTATCA AAAAAAAGTC GAC
```

1 TCTTCCGCTT CCTCGCTCAC TGA CTCTGCTG CGCTCGGTCG TTCGGCTGCG GCGAGCGGTA  
61 TCAGCTCACT CAAAGGCGGT AATACGGTTA TCCACAGAAT CAGGGGATAA CGCAGGAAAG  
121 AACATGTGAG CAAAAGGCCA GCAAAAAGGCC AGGAACCGTA AAAAGGCCGC GTTGTGGCG  
181 TTTTCCATA GGCTCCGCC CCCTGACGAG CATCACAAA ATCGACGCTC AAGTCAGAGG  
241 TGGCGAAACC CGACAGGACT ATAAAGATAC CAGGCGTTTC CCCCTGGAAG CTCCCTCGTG  
301 CGCTCTCCTG TTCCGACCCT GCCGCTTACC GGATACCTGT CCGCCTTTCT CCCTTCGGGA  
361 AGCGTGGCGC TTTCTCATAG CTCACGCTGT AGGTATCTCA GTTCGGTGTA GGTCTGTCG  
421 TCCAAGCTGG GCTGTGTGCA CGAACCCCG GTTCAGCCCG ACCGCTGCGC CTTATCCGGT  
481 AACTATCGTC TTGAGTCCAA CCCGGTAAGA CACGACTTAT CGCCACTGGC AGCAGCCACT  
541 GGTAACAGGA TTAGCAGAGC GAGGTATGTA GCGGTGCTA CAGAGTTCTT GAAGTGGTGG  
601 CCTAACTACG GCTACACTAG AAGAACAGTA TTTGGTATCT GCGCTCTGCT GAAGCCAGTT  
661 ACCTTCGGA AAAGAGTTGG TAGCTCTTGA TCCGGCAAA ACACCACCGC TGGTAGCGGT  
721 GGTTTTTTT TTTGCAAGCA GCAGATTACG CGCAGAAAA AAGGATCTCA AGAAGATCCT  
781 TTGATCTTTT CTACGGGGT TGACGCTCAG TGGAACGAAA ACTCACGTTA AGGGATTTT  
841 ATCATGAGAT TATCAAAAAG GATCTTACC TAGATCCTTT TAAATTA AAA ATGAAGTTTT  
901 AAATCAATCT AAAGTATATA TGAGTAACT TGGTCTGACA GTTACCAATG CTTAATCAGT  
961 GAGGCACCTA TCTCAGCGAT CTGTCTATTT CGTTCATCCA TAGTTGCCGT ACTCCCGTCT  
1021 GTGTAGATAA CTACGATACG GGAGGGCTTA CCATCTGGCC CCAGTGCTGC AATGATACCG  
1081 CGAGACCCAC GCTCACCGGC TCCAGATTTA TCAGCAATAA ACCAGCCAGC CGGAAGGGCC  
1141 GAGCGCAGAA GTGGTCCCTGC AACTTTATCC GCCTCCATCC AGTCTATTAA TTGTTGCCGG  
1201 GAAGCTAGAG TAAGTAGTTC GCCAGTTAAT AGTTTGC GCA ACGTTGTTGC CATTGCTACA  
1261 GGCATCGTGG TGTACGCTC GTCGTTTGGT ATGGCTTCAT TCAGCTCCGG TTCCCAACGA  
1321 TCAAGCGAG TTACATGATC CCCCATGTTG TGCAAAAAAG CGGTTAGCTC CTTCCGGTCT  
1381 CCGATCGTTG TCAGAAGTAA GTTGGCCGCA GTGTTATCAC TCATGGTTAT GGCAGCACTG  
1441 CATAATTCTC TTA CTGTGCAT GCCATCCGTA AGATGCTTTT CTGTGACTGG TGAGTACTCA  
1501 ACCAAGTCAT TCTGAGAATA GTGTATGCGG CGACCGAGTT GCTCTTGCCC GGCCTCAATA  
1561 CGGGATAATA CCGCGCCACA TAGCAGAACT TAAAAAGTGC TCATCATTTG AAAACGTTCT  
1621 TCGGGGCGAA AACTCTCAAG GATCTTACCG CTGTTGAGAT CCAGTTCGAT GTAACCCACT  
1681 CGTGACCCCA ACTGATCTTC AGCATCTTTT ACTTTACCA GCGTTTCTGG GTGAGCAAAA  
1741 ACAGGAAGGC AAAATGCCGC AAAAAAGGGA ATAAGGGCGA CACGGAAATG TTGAATACTC  
1801 ATACTCTTCC TTTTCAATA TTATTGAAGC ATTTATCAGG GTTATTGTCT CATGAGCGGA  
1861 TACATATTTG AATGTATTTA GAAAAATAAA CAAATAGGGG TTCCGCGCAC ATTTCCCCGA  
1921 AAAGTGCCAC CTGACGTCTA AGAAACCAT ATTATCATGA CATTAACTA TAAAAATAGG  
1981 CGTATCACGA GGCCCTTTCG TCTCGCGCGT TTCGGTGATG ACGGTGAAAA CCTCTGACAC  
2041 ATGCAGCTCC CGGAGACGGT CACAGCTTGT CTGTAAGCGG ATGCCGGGAG CAGACAAGCC  
2101 CGTCAGGGCG CGTCAGCGGG TGTGGCGGGG TGTCGGGGCT GGCTTAACTA TCGGGCATCA  
2161 GAGCAGATTG TACTGAGAGT GCACCATAAA ATGTAAAACG TTAATATTTT GTTAAAAATC  
2221 GCGTTAAAT TTTGTTAAAT CAGCTCATTT TTTAAACCAAT AGGCCGAAAT CGGCAAAATC  
2281 CCTTATAAAT CAAAAGAATA GCCCGAGATA GGGTTGAGTG TTGTTCCAGT TTGGAACAAG  
2341 AGTCCACTAT TAAAGAACGT GACTCCAAC GTCAAAAGGC GAAAAACCGT CTATCAGGGC  
2401 GATGGCCAC TACGTGAACC ATCACCAAA TCAAGTTTTT TGGGGTCGAG GTGCCGTAAA  
2461 GACTAAATC GGAACCTAA AGGGAGCCCC CGATTTAGAG CTTGACGGGG AAAGCCGGCG  
2521 AACGTGGCGA GAAAGGAAGG GAAGAAAGCG AAAGGAGCGG GCGTAGGGC GCTGGCAAGT  
2581 GTAGCGGTCA CGCTGCGCGT AACCACCACA CCCGCCGCGC TTAATGCGCC GCTACAGGGC  
2641 GCGTACTATG GTTGCTTTGA CGTATGCGGT GTGAAATACC GCACAGATGC GTAAGGAGAA  
2701 AATACCGCAT CAGGCGCCAT TCGCCATTCA GGCTGCGCAA CTGTTGGGAA GGGCGATCGG  
2761 TGCGGGCTC TTCGCTATTA CGCCAGCTGG CGAAAGGGGG ATGTGCTGCA AGGCGATTAA  
2821 GTTGGGTAAC GCCAGGGTTT TCCCAGTAC GACGTTGTAA AACGACGGCC AGTGAATTCG  
2881 AATGGCCATG GGACGTGAC CTGAGGTAAT TATAACCCGG GCCCTATATA TGGATCCAAT  
2941 TGCAATGAT ATCATGACAG ATCTGCGCGG GATCGATATC AGCGCTTTAA ATTTCCGCAT  
3001 GCTAGCTATA GTTCTAGAG TACCGTTGT TAACGTTAGC CGGCTACGTA TACTCCGAA  
3061 TATTAATAGG CCTAGGATGC ATATGTTAAG AGTGTGTTGA TAGTGCAGTA TCTTAAAAAT  
3121 TTGTATAATA GGAATTGAAG TTAAATTAGA TGCTAAAAAT TTGTAATTAA GAAGGAGTGA  
3181 TTACATGAAC AAAAAATATA AATATTCTCA AAACTTTTTA ACGAGTGAAA AAGTACTCAA  
3241 CCAAATAATA AAACAATTGA ATTTAAAAAG AACCGATACC GTTTACGAAA TTGGAACAGG  
3301 TAAAGGGCAT TTAACGACGA AACTGGCTAA AATAAGTAAA CAGGTAACGT CTATTGAATT

3361 AGACAGTCAT CTATTCAACT TATCGTCAGA AAAATTAAAA CTGAATACTC GTGTCAC TTT  
3421 AATTCACCAA GATATTCTAC AGTTTCAATT CCTAACAAA CAGAGGTATA AAATTGTTGG  
3481 GAGTATTCCCT TACCATTTAA GCACACAAAT TATTAACAAA GTGGTTTTTTG AAAGCCATGC  
3541 GTCTGACATC TATCTGATTG TTGAAGAAGG ATTCTACAAG CGTACCTTGG ATATTACCCG  
3601 AACACTAGGG TTGCTCTTGC ACACTCAAGT CTCGATTCAG CAATTGCTTA AGTGCCAGC  
3661 GGAATGCTTT CATCCTAAC CAAAAGTAAA CAGTGTCTTA ATAAACTTA CCCGCCATAC  
3721 CACAGATGTT CCAGATAAAT ATTGGAAGCT ATATACGTAC TTTGTTTCAA AATGGGTCAA  
3781 TCGAGAATAT CGTCAACTGT TACTAAAAA TCAGTTTCAT CAAGCAATGA AACACGCCAA  
3841 AGTAAACAAT TTAAGTACCG TACTTATGA GCAAGTATTG TCTATTTTTTA ATAGTTATCT  
3901 ATTATTTAAC GGGAGGAAAT AATTCTATGA GTCGCTTTTG TAAATTTGGA AAGTTACACG  
3961 TACTAAAAG GAATGTAGAT AAATTATTAG GTATACTACT GACAGCTTCC AAGCATATGG  
4021 CGGCCGCTG CAGCTGGCGC CATCGATACG CGTACGTCGC GACCGCGGAC ATGTACAGAG  
4081 CTCGAGAAAT ACTAGTGGCC ACGTGGGCCG TGCACCTTAA GCTTGGCGTA ATCATGGTCA  
4141 TAGCTGTTTC CTGTGTGAAA TTGTTATCCG CTCACAATC CACACAACAT ACGAGCCGGA  
4201 AGCATAAAGT GTAAAGCCTG GGGTGCCTAA TGAGTGAGCT AACTCACATT AATTGCGTTG  
4261 CGCTCACTGC CCGCTTTCCA GTCGGGAAAC CTGTCTGTCC AGCTGCATTA ATGAATCGGG  
4321 CAACGCGCGG GGAGAGGCGG TTTGCGTATT GGGCGC

**pSLERG**

1 TCTTCCGCTT CCTCGCTCAC TGA CTGCTGCTG CGCTCGGTCG TTCGGCTGCG GCGAGCGGTA  
61 TCAGCTCACT CAAAGGCGGT AATACGGTTA TCCACAGAAT CAGGGGATAA CGCAGGAAAG  
121 AACATGTGAG CAAAAGGCCA GCAAAGGCC AGGAACCGTA AAAAGGCCGC GTTGCTGGCG  
181 TTTTCCATA GGCTCCGCC CCCTGACGAG CATCACAAA ATCGACGCTC AAGTCAGAGG  
241 TGGCGAAACC CGACAGGACT ATAAAGATAC CAGGCGTTTC CCCCTGGAAG CTCCCTCGTG  
301 CGCTCTCCTG TTCCGACCCCT GCCGCTTACC GGATACCTGT CCGCCTTTCT CCCTTCGGGA  
361 AGCGTGCGC TTTCTCATAG CTCACGCTGT AGGTATCTCA GTTCGGTGTA GGTGCTCGC  
421 TCCAAGCTGG GCTGTGTGCA CGAACCCCTT GTCAGCCCG ACCGCTGCGC CTTATCCGGT  
481 AACTATCGTC TTGAGTCCAA CCCGGTAAGA CACGACTTAT CGCCACTGGC AGCAGCCACT  
541 GGTAACAGG TTAGCAGAGC GAGGTATGTA GGCGGTGCTA CAGAGTTCTT GAAGTGGTGG  
601 CCTAAGCTAG GCTCACTAG AAGAACAGTA TTTGGTATCT GCGCTCTGCT GAAGCCAGTT  
661 ACCTTCGGAA AAAGAGTTGG TAGCTCTTGA TCCGGCAAAC AAACCACCGT TGGTAGCGGT  
721 GGTTTTTTTG TTTGCAAGCA GCAGATTACG CGCAGAAAAA AAGGATCTCA AGAAGATCCT  
781 TTGATCTTTT CTACGGGGTC TGACGCTCAG TGGAACGAAA ACTCACGTTA AGGGATTTTTG  
841 GTCATGAGAT TATCAAAAAG GATCTTCACC TAGATCCTTT TAAATTAAAA ATGAAGTTTTT  
901 AAATCAATCT AAAGTATATA TGAGTAAACT TGGTCTGACA GTTACCAATG CTTAATCAGT  
961 GAGGCACCTA TCTCAGCGAT CTGTCTATTT CGTTCATCCA TAGTTGCCTG ACTCCCCGTC  
1021 GTGTAGATAA CTACGATACG GGAGGGCTTA CCATCTGGCC CCAGTGCTGC AATGATACCG  
1081 CGAGACCCAC GCTCACCAGG TCCAGATTTA TCAGCAATAA ACCAGCCAGC CGGAAGGGCC  
1141 GAGCGCAGAA GTGGTCTTGC AACTTTATCC GCCTCCATCC AGTCTATTAA TTGTTGCCGG  
1201 GAAGCTAGAG TAAGTAGTTC GCCAGTTAAT AGTTTGCAGC ACGTTGTTGC CATTGCTACA  
1261 GGATCGTGG TGTACGCTC GTCGTTTGGT ATGGCTTCAT TCAGCTCCGG TTCCCAACGA  
1321 TCAAGGCGAG TTACATGATC CCCCATGTTG TGCAAAAAG CGGTTAGCTC CTTCGGTCTT  
1381 CCGATCGTTG TCAGAAGTAA GTTGGCCGCA GTGTTATCAC TCATGGTTAT GGCAGCACTG  
1441 CATAATCTC TACTGTTCAT GCCATCCGTA AGATGCTTTT CTGTGACTGG TGAGTACTCA  
1501 ACCAAGTCAT TCTGAGAATA GTGTATGCGG CGACCGAGTT GCTCTTGCCC GCGTCAATA  
1561 CGGGATAATA CCGGCCACA TAGCAGAACT TAAAAAGTGC TCATCATTTG AAAACGTTCT  
1621 TCGGGGCGAA AACTCTCAAG GATCTTACCG CTGTTGAGAT CCAGTTGATG GTAACCCACT  
1681 CGTGCAACCA ACTGATCTTC AGCATCTTTT ACTTTACCA CCGTTTCTGG GTGAGCAAAA  
1741 ACAGGAAGGC AAAATGCCGC AAAAAAGGGA ATAAGGGCGA CACGAAATG TTGAAATCTC  
1801 ATACTCTTCC TTTTCAATA TTATTGAAGC ATTTATCAGG GTTATTGTCT CATGAGCGGA  
1861 TACATATTTG AATGTATTTA GAAAAATAA CAAATAGGGG TTCCGCGCAC ATTTCCCGGA

1921 AAAGTGCCAC CTGACGTCTA AGAAACCATT ATTATCATGA CATTAAACCTA TAAAAATAGG  
1981 CGTATCACGA GGCCCTTTTCG TCTCGCGCGT TTCGGTGATG ACGGTGAAAA CCTCTGACAC  
2041 ATGCAGCTCC CGGAGACGGT CACAGCTTGT CTGTAAGCGG ATGCCGGGAG CAGACAAAGCC  
2101 CGTCAGGGCG CGTCAGCGGG TGTTGGCGGG TGTCGGGGCT GGCTTAACTA TGCGGCATCA  
2161 GAGCAGATTG TACTGAGAGT GCACCATAAA ATTGTAACG TTAATATTTT GTTAAAAATC  
2221 GCGTTAAAT TTTGTTAAAT CAGCTCATTT TTTAACCAAT AGGCCGAAAT CGGCAAAATC  
2281 CCTTATAAAT CAAAAGAATA GCCCGAGATA GGGTTGAGTG TTGTTCCAGT TTGGAACAAG  
2341 AGTCCACTAT TAAAGAACGT GGACTCCAAC GTCAAAGGGC GAAAAACCGT CTATCAGGGC  
2401 GATGGCCAC TACGTGAACC ATCACCCAAA TCAAGTTTTT TGGGGTCGAG GTGCCGTAAA  
2461 GCACTAAATC GGAACCCATA AGGGAGCCCC CGATTTAGAG CTTGACGGGG AAAGCCGGCG  
2521 AACGTGGCGA GAAAGGAAGG GAAGAAAGCG AAAGGAGCGG GCGCTAGGGC GCTGGCAAGT  
2581 GTAGCGGTCA CGCTGCGCGT AACACCACA CCCGCCGCGC TTAATGCGCC GCTACAGGGC  
2641 GCGTACTATG GTTGCTTTGA CGTATGCGGT GTGAAATACC GCACAGATGC GTAAGGAGAA  
2701 AATACCGCAT CAGGCCCAT TCGCCATTCA GGCTGCGCAA CTGTTGGGAA GGGCGATCGG  
2761 TGCGGGCCCT TTCGCTATTA CGCCAGCTGG CGAAAGGGGG ATGTGCTGCA AGGCGATTAA  
2821 GTTGGGTAAAC GCCAGGGTTT TCCCAGTAC GACGTTGTAA AACGACGGCC AGTGAATTCG  
2881 AATGGCCATG GAGGATTTAT TCTCTCCGCA GTTTTGAGCT TAATCGTCTC ATTAECTACT  
2941 GCACTTTTCT CCGATTGGCT TCGTCGGAGA AAATAATCTA ACGGCATGAA GCGCAAATTA  
3001 AAAGCCACTC AACTATGGGC CTAGTTGGGT GGCTTTTTTTG CAACCATTAC GGTTTTACTT  
3061 CTCTATAAGA ATTATAGCAT CAATCTTCAT CATTAGCCAA CTCAATAGAA GCTCGATATA  
3121 GATCATGTTG AGCTTTATCC AAGCTATCTA AAAGTTCGCC ATAAATATCA ATATTTTTCT  
3181 TTTTCAGCAAC CAATTTTTTC AAATCTTGAA GATTATCAGC AATCTGTTCT GCCATAACTC  
3241 CATAGATTTT AGCTTGTTTC TTCATATTGT CAATTGTCTT AATATCTTGT AACTCCATTC  
3301 CTATCACTCC CATCTTACAT AGTTACTTAC CTTAGAATTC CAACGATATA TCACAGTATC  
3361 TACAACATCA TCTTTTTCTT TTTTCGTCAT CACATTAATT AGATCATCTT CTTTTTCGTC  
3421 CAGCAATAAC TCATGATGAA TCTCTTTTAG TAATCCCGCA AAGCTTAATT GTCGAGTTCC  
3481 AGCCAGAGCA TGCTCGAGCT CGTCAACAAC AACTAAATCG CCTTCTCAT CATCCGTAAT  
3541 ATAATCATAA TCTTTAACTT GATATTTACT TACTTCTTTT GCCGAAGCAA TCAAACTATT  
3601 ATCTTTTTTT GACGCCCCGAA TTTTCTTGAT ATTAACAATC GGCTTGAGT CTAATTTCCCT  
3661 TGCTCGCTTC CATAATTGTG ACCAATTCTC TTGGGTAAGA TAATGACCCCT TAGAAAAATA  
3721 ACTAGATTTT ACCATTAACA AAATATGTAC ATGTTGATGG AAAGTTAGAC TATCTCGATT  
3781 GACCGTTAT TCTGTAGATC GCACATAAC AAGAAGATCT TTTTTTACAT CTTTATATTG  
3841 TAAAAGCCGA TAAATTGAAC GATTCACTGA AGTAAGATTT TTTCTAAGCT CGCCCACTT  
3901 TGAGCTTTCC TCAGTTAATG TCAAGAACAG AAATATAGCA CTAGGATCCT TTTTATATGC  
3961 TGTAICTAAA ATTTGACGCA ACTCATAAGA ATTTTTCATC GATCGGCGCC AGCTACATAA  
4021 TGGACAAAAGT CTCGAATGAC AAAACCACGT TTGATATAAC TTTAAACCAT TATCAGTTTT  
4081 CGCAAATTGA AGAACTTCTC CGCACTTTGA AACGTTATGA GCTTTTTTAA AATTTAAAAAC  
4141 CTCCAGATAT TGGGAATAAG TTAAGTTAGC AAGTTTTTTC TGCTTCCAG GTCTAACTTT  
4201 CCCATTACTA GAGGTATCTT TTAGAATTTT TTTTTTATAC ATTTCTTATA CCTCTAACTG  
4261 CAAAAACTAC AAGCAGTCAG AGTTAGTTAT CATTGATATA TTCCTAATGA CATATTATAA  
4321 TAGGGTTCTGA AGTTAATAAC GATAACTAAC TCATGCATCG ACGCCAAAT CGAACAACCTG  
4381 CATGAGTTTT TTATTTAATT CTTACAATGC TTATTATACA CAAAAAGTG TTATATTTTA  
4441 AAATCCTAAT AAACCAGTC ATATCAAGGG TTTAACCCTA TTTCAAAAAA TGGCGTTGTT  
4501 TCTATATGTA TCAAGATAAG AAGAACTCG CTTACAGCGA GTTCTAAAT AGGGGTTTCA  
4561 CCCCTAAAAC CCTGACCAGC TGAGCCAGCT GGACCGCATT TCCCCTCGCC GGGCGGGCGT  
4621 AAAGCGGAAA AAATGACTTT TTTCTCGCTT TCGCTCAACT AGGGTCTTCC CGTCTACCA  
4681 TGTCAGCGC TGCCCTTCCG CTACGTCCA GCGTTTTGTC GCTTGACACT CACCTACTAA  
4741 CAGCGGGCTT CGCCACCAGT CTACTATCTG CAACACGGCA ACAAGATTAA TCAGAATATG  
4801 CATTGAAGCA GTGCGCTCCG CTCTTGTCT TGCGACAAAAG CGAGCGCACT GCTTCAATGC  
4861 TTTTTTATTT TCTGAATTC ATAACTCGAT AATTAGAAAA AGTTAGTCCG TTAGAAACGT  
4921 CTGCCACGCC GAGGAAGTCA TTCCAGTTTG ACCACTCAA TCATCAGCGA CATCATGAG  
4981 ATAATCAATC AGCAATTTTC TAGTTTCTAT CTGCTTTGGA ATTTTTACCA CAGCCAAAAT  
5041 TGAGTCCCAC TTAGCAATCA CAAAAGATTT TCTGACGGCT TTATTAGCCT TTTCCGCACT  
5101 AATATTTTTT GCTTTATCTC GTTTATTTTG ATCGGTGCGT GGTATCCGAT CGACTGTTGT  
5161 TACAGCATTT GACGCAGGTT GCTAGATAAA CGACTAGACC GAATAATTTT TATTTCAACT  
5221 ATTTTTGCAA CCAAAAAAAT CAAAAAATA TCAACCAATA AAACGATAAC TAACCTCTTG

5281 CTACATCCGA TTAATTTTTTC TCCAGCCTGC CAGAAATCGG CCCAAATATT GAAATATTGA  
5341 GGAAATTTTG GGCTGAAAAA AACATTAATT TTTTCGGCAA ACAAGCCAAC ACAGCCAAGC  
5401 AGAAAAGCTA AGAAAATAAG TTCCAGCCAA TTAaaaaaatc GCCACGAAAG AGAAAAAAAT  
5461 CGGTCAAAAT AAATCGAACT TGATTTCAAT TTCTAGCCCC CGAAGTCTTC GATAAACGGC  
5521 GCCATAAAAG GAACTACACG GTTTTCCGGT TGAGTACTTG CAAGCCCTAA CCCCTTAGAA  
5581 AAGCCGTCAT GATTAACAAC TGTTGTGCGC TCAGCTAGGG CCCTATATAT GGATCCAATT  
5641 GCAATGATCA TCATGACAGA TCTGCGCGCG ATCGATATCA GCGCTTTAAA TTTGCGCATG  
5701 CTAGCTATAG TTCTAGAGGT ACCGGTTGTT AACGTTAGCC GGCTACGTAT ACTCCGGAAT  
5761 ATTAATAGGC CTAGGATGCA TATGCTTAGA AGCAAACCTA AGAGTGTGTT GATAGTGCAG  
5821 TATCTTAAAA TTTTGTATAA TAGGAATTGA AGTTAAATTA GATGCTAAAA ATTTGTAAAT  
5881 AAGAAGGAGT GATTACATGA ACAAAAAATAT AAAATATTTCT CAAAACTTTT TAACGAGTGA  
5941 AAAAGTACTC AACCAAAATA TAAAACAATT GAATTTAAAA GAAACCGATA CCGTTTACGA  
6001 AATTGGAACA GGTAAAGGGC ATTTAACGAC GAAACTGGCT AAAATAAGTA AACAGGTAAC  
6061 GTCTATTGAA TTAGACAGTC ATCTATTCAA CTTATCGTCA GAAAAATTAA AACTGAATAC  
6121 TCGTGTCACT TTAATTCACC AAGATATTCT ACAGTTTCAA TTCCCTAACA AACAGAGGTA  
6181 TAAAAATTGTT GGGAGTATTC CTTACCATT T AAGCACACAA ATTATTAAAA AAGTGGTTTT  
6241 TGAAAGCCAT GCGTCTGACA TCTATCTGAT TGTGAAGAA GGATTCTACA AGCGTACCTT  
6301 GGATATTCAC CGAACACTAG GGTGCTCTT GCACACTCAA GTCTCGATT AGCAATTGCT  
6361 TAAGCTGCCA GCGGAATGCT TTCATCCTAA ACCAAAAGTA AACAGTGTCT TAATAAAACT  
6421 TACCCGCCAT ACCACAGATG TTCCAGATAA ATATTGGAAG CTATATACGT ACTTTGTTTC  
6481 AAAATGGGTC AATCGAGAAT ATCGTCAACT GTTTACTAAA AATCAGTTTC ATCAAGCAAT  
6541 GAAACACGCC AAAGTAAACA ATTTAAGTAC CGTTACTTAT GAGCAAGTAT TGTCTATTTT  
6601 TAATAGTTAT CTATTATTTA ACGGGAGGAA ATAATTCTAT GAGTCGCTTT TGTAATTTT  
6661 GAAAGTTACA CGTTACTAAA GGAATGTAG ATAATTATT AGGTATACTA CTGACAGCTT  
6721 CCAAGCATAT GCGGCGCCG TGCAGCTGGC GCCATCGATA CGCGTACGTC GCGACCGCGG  
6781 ACATGTACAG AGCTCGAGAA GTACTAGTGG CCACGTGGGC CGTGACCTT AAGCTTGGCG  
6841 TAATCATGGT CATAGCTGTT TCCTGTGTGA AATTGTTATC CGCTCACAAT TCCACACAAC  
6901 ATACGAGCCG GAAGCATAAA GTGTAAAGCC TGGGGTGCC T AATGAGTGAG CTAATCACA  
6961 TTAATTGCGT TGCCTCACT GCCCGCTTTC CAGTCGGGAA ACCTGTCTGTG CCAGCTGCAT  
7021 TAATGAATCG GCCAACGCGC GGGGAGAGGC GGTTCGCGTA TTGGGCGC

**pHENOMM**

1 TCTTCCGCTT CCTCGCTCAC TGACTCGCTG CGCTCGGTCG TTCGGGCTGCG GCGAGCGGTA  
61 TCAGCTCACT CAAAGGCGGT AATACGGTTA TCCACAGAAT CAGGGGATAA CGCAGGAAAG  
121 AACATGTGAG CAAAAGGCCA GCAAAAAGGCC AGGAACCGTA AAAAGGCCGC GTTGTGGCG  
181 TTTTCCATA GGCTCCGCC CCCTGACGAG CATCACAAAA ATCGACGCTC AAGTCAGAGG  
241 TGGCGAAACC CGACAGGACT ATAAAGATAC CAGGCGTTTC CCCCTGGAAG CTCCCTCGTG  
301 CGCTCTCCTG TTCCGACCCT GCCGCTTACC GGATACCTGT CCGCTTTTCT CCCTTCGGGA  
361 AGCGTGGCG TTTCTCATAG CTCACGCTGT AGGTATCTCA GTTCGGTGTA GGTCTTCGC  
421 TCCAAGCTGG GCTGTGTGCA CGAACCCCTT GTTCAGCCCG ACCGCTGCGC CTTATCCGGT  
481 AACTATCGTC TTGAGTCCAA CCCGGTAAGA CACGACTTAT CGCCACTGGC AGCAGCCACT  
541 GGTAACAGGA TTAGCAGAGC GAGGTATGTA GCGGTGCTA CAGAGTTCTT GAAGTGGTGG  
601 CCTAACTACG GCTACACTAG AAGAACAGTA TTTGGTATCT GCGCTCTGCT GAAGCCAGTT  
661 ACCTTCGGAA AAAGAGTTGG TAGCTCTTGA TCCGGCAAAC AAACCACCGC TGGTAGCGGT  
721 GGTTTTTTT TTTGCAAGCA GCAGATTACG CGCAGAAAAA AAGGATCTCA AGAAGATCCT  
781 TTGATCTTTT CTACGGGGTC TGACGCTCAG TGAACGAAA ACTCACGTTA AGGGATTTT  
841 GTCATGAGAT TATCAAAAAG GATCTTCACC TAGATCCTTT TAAATTTAAAA ATGAAGTTTT  
901 AAATCAATCT AAAGTATATA TGAGTAAACT TGGTCTGACA GTTACCAATG CTTAATCAGT  
961 GAGGCACCTA TCTCAGCGAT CTGTCTATTT CGTTCATCCA TAGTTGCTG ACTCCCCGTC  
1021 GTGTAGATAA CTACGATACG GGAGGGCTTA CCACTGGGCC CCAGTGCTGC AATGATACCG  
1081 CGAGACCCAC GCTCACCGGC TCCAGATTTA TCAGCAATAA ACCAGCCAGC CGGAAGGGCC

1141 GAGCGCAGAA GTGGTCCTGC AACTTTTATCC GCCTCCATCC AGTCTATTAA TTGTTGCCGG  
1201 GAAGCTAGAG TAAGTAGTTC GCCAGTTAAT AGTTTGCGCA ACGTTGTTGC CATTGCTACA  
1261 GGCATCGTGG TGTACGCTC GTCGTTTGGT ATGGCTTCAT TCAGCTCCGG TTCCCAACGA  
1321 TCAAGGCGAG TTACATGATC CCCCATGTTG TGCAAAAAAG CGGTTAGCTC CTTCCGGTCT  
1381 CCGATCGTTG TCAGAAGTAA GTTGGCCGCA GTGTTATCAC TCATGGTTAT GGCAGCACTG  
1441 CATAATTCTC TTAATGTCAT GCCATCCGTA AGATGCTTTT CTGTGACTGG TGAGTACTCA  
1501 ACCAAGTCAT TCTGAGAATA GTGTATGCGG CGACCGAGTT GCTCTTGCCC GGCCTCAATA  
1561 CGGGATAATA CCGCGCCACA TAGCAGAACT TTAAAAGTGC TCATCATGGG AAAACGTTCT  
1621 TCGGGGCGAA AACTCTCAAG GATCTTACCG CTGTTGAGAT CCAGTTCGAT GTAACCCACT  
1681 CGTGCAACCA ACTGATCTTC AGCATCTTTT ACTTTTACCA GCGTTTCTGG GTGAGCAAAA  
1741 ACAGGAAGGC AAAATGCCGC AAAAAAGGGA ATAAGGGCGA CACGGAAATG TTGAATACTC  
1801 ATACTCTTCC TTTTTC AATA TTATTGAAGC ATTTATCAGG GTTATTGTCT CATGAGCGGA  
1861 TACATATTTG AATGTATTTA GAAAAATAAA CAAATAGGGG TTCCGCGCAC ATTTCCCGGA  
1921 AAAGTGCCAC CTGACGTCTA AGAAACCAT ATTATCATGA CATTAACTA TAAAAATAGG  
1981 CGTATCACGA GGCCCTTTTCG TCTCGCGCGT TTCGGTGATG ACGGTGAAA CCTCTGACAC  
2041 ATGCAGCTCC CGGAGACGGT CACAGCTTGT CTGTAAGCGG ATGCCGGGAG CAGACAAGCC  
2101 CGTCAGGGCG CGTCAGCGGG TGTTGGCGGG TGTCGGGGCT GGCTTAACTA TCGCGCATCA  
2161 GAGCAGATTG TACTGAGAGT GCACCATAAA ATTGTAAACG TTAATATTTT GTTAAATTC  
2221 GCGTTAAAT TTTGTTAAAT CAGCTCATTT TTTAACCAAT AGGCCGAAAT CGGCAAAATC  
2281 CCTTATAAAT CAAAAGAATA GCCCGAGATA GGGTTGAGTG TTGTTCCAGT TTGGAACAAG  
2341 AGTCCACTAT TAAAGAACGT GGACTCCAAC GTCAAAGGGC GAAAAACCGT CTATCAGGGC  
2401 GATGGCCAC TACGTGAACC ATCACCCAAA TCAAGTTTTT TGGGGTCGAG GTGCCGTAAA  
2461 GCACTAAATC GGAACCTTAA AGGGAGCCCC CGATTTAGAG CTTGACGGGG AAAGCCGGCG  
2521 AACGTGGCGA GAAAGGAAGG GAAGAAAGCG AAAGGAGCGG GCGCTAGGGC GCTGGCAAGT  
2581 GTAGCGGTCA CGCTGCGCGT AACCACCACA CCCGCCGCGC TTAATGCGCC GCTACAGGGC  
2641 GCGTACTATG GTTGCTTTGA CGTATGCGGT GTGAAATACC GCACAGATGC GTAAGGAGAA  
2701 AATACCGCAT CAGGCGCCAT TCGCCATTCA GGCTGCGCAA CTGTTGGGAA GGGCGATCGG  
2761 TGCGGGCCTC TTCGCTATTA CGCCAGCTGG CGAAAGGGGG ATGTGCTGCA AGGCGATTAA  
2821 GTTGGGTAAC GCCAGGGTTT TCCCAGTCAC GACGTTGTAA AACGACGGCC AGTGAATTCG  
2881 AATGGCCATG GAGGATTTAT TCTCTCCGCA GTTTTGAGCT TAATCGTCTC ATTAACTACT  
2941 GCACTTTTCT CCGATTGGCT TCGTCGGAGA AAATAATCTA ACGGCATGAA GCGCAAAATTA  
3001 AAAGCCACT AACTATGGGC CTAGTTGGGT GGCTTTTTTTG CAACCATTAC GGTTTTACTT  
3061 CTCTATAAGA ATTATAGCAT CAATCTTCAT CATTAGCCAA CTCAATAGAA GCTCGATATA  
3121 GATCATGTTG AGCTTTATCC AAGTATCTA AAAGTTCGCC ATAAATATCA ATATTTTCTC  
3181 TTTCAAGCAAC CAATTTTTTC AAATCTTGAA GATTATCAGC AATCTGTTCT GCCATAACTC  
3241 CATAGATTTT AGCTTGTTTC TTCATATTTG CAATTGTCTT AATATCTTGT AACTCCATTC  
3301 CTATCACTCC CATCTTACAT AGTTACTTAC CTTAGAATTC CAACGATATA TCACAGTATC  
3361 TACAACATCA TCTTTTTCTT TTTTCGTCATC CACATTAATT AGATCATCTT CTTTTTCGTC  
3421 CAGCAATAAC TCATGATGAA TCTCTTTTAG TAATCCCGCA AAGCTTAATT GTCGAGTTCC  
3481 AGCCAGAGCA TGCTCGAGCT CGTCAACAAC AACTAAATCG CCTTCTCAT CATCCGTAAT  
3541 ATAATCATAA TCTTTAACTT GATATTTACT TACTTCTTTT GCCGAAGCAA TCAAACATAT  
3601 ATCTTTTTTT GACGCCGAA TTTTCTTGAT ATTAACAATC GGCTTGTAGT CTAATTTTCT  
3661 TGCTCGCTTC CATAATTGTG ACCAATTCTC TTGGGTAAGA TAATGACCCT TAGAAAAATA  
3721 ACTAGATTTT ACCATTAACA AAATATGTAC ATGTTGATGG AAAGTTAGAC TATCTCGATT  
3781 GACCGTTATT TCTGTAGATC GCACATAACC AAGAAGATCT TTTTTTACAT CTTTATATTG  
3841 AAAAAGCCGA TAAATGAAAC GATTCATCGA AGTAAGATTT TTTCTAAGCT CGCCCAACTT  
3901 TGAGCTTTCC TCAGTTAATG TCAAGAACAG AAATATAGCA CTAGGATCCT TTTTATATGC  
3961 TGTATCTAAA ATTTGACGCA ACTCATAAGA ATTTTTTCATC GATCGGCGCC AGCTACATAA  
4021 TGGACAAAAGT CTCGAATGAC AAAACCACGT TTGATATAAC TTTAAACCAT TATCAGTTTT  
4081 CGCAAATTGA AGAACTTCTC CGCACTTTGA AACGTTATGA GCTTTTTTAA AATTTAAAAC  
4141 CTCCAGATA TGGGAATAAG TTAAGTTAG AAGTTTTTTC TGCTTCCACG GTCTAACTTT  
4201 CCCATTAATA GAGGTATCTT TTAGAATTTT TTTTTTATAC ATTTCTTATA CCTCTAACTG  
4261 CAAAAACTAC AAGCAGTCAG AGTTAGTTAT CATTGATATA TTCCTAATGA CATATATAA  
4321 TAGGGTTTCGA AGTTAATAAC GATAACTAAC TCATGCATCG ACGGCCAAAT CGAACAACTG  
4381 CATGAGTTTT TTATTTAATT CTTACAATGC TTATTATACA CCAAAAAGTG TTATATTTTTA  
4441 AAATCCTAAT AAACCCAGTC ATATCAAGGG TTTAACCCAA TTTCAAAAAA TGGCGTTGTT

4501 TCTATATGTA TCAAGATAAG AAGAAACTCG CTTACAGCGA GTTTCTAAAT AGGGGTTTCA  
4561 CCCCTAAAAC CCTGACCAGC TGAGCCAGCT GGACCCGATT TCCCCTCGCC GGGCGGGCGT  
4621 AAAGCGGAAA AAATGACTTT TTTCTCGCTT TCGCTCAACT AGGGTCTTCC CGTCTCACCA  
4681 TGTC AAGCGC TGCCCTTCCG CTACGCTCCA GCGTFTTGTC GCTTGACACT CACCTACTAA  
4741 CAGCGGGCTT CGCCACCAGT CTACTATCTG CAACACGGCA ACAAGATTAA TCAGAATATG  
4801 CATTGAAGCA GTGCGCTCCG CTCCTTGTCT TGCGACAAAG CGAGCGCACT GCTTCAATGC  
4861 TTTTTTATTT TCTGAATTCC ATAACCTCGAT AATTAGAAAA AGTTAGTCCG TTAGAAAACGT  
4921 CTGCCACGCC GAGGAAGTCA TTCCAGTTTG ACCACTCAAA TCATCAGCGA CATCATTGAG  
4981 ATAATCAATC AGCAATTTTC TAGTTTCTAT CTGCTTTGGA ATTTTTACCA CAGCCAAAAT  
5041 TGAGTCCCAC TTAGCAATCA CAAAAGATTT TCTGACGGCT TTATTAGCCT TTTCCGCACT  
5101 AATATTTTTT GCTTTATCTC GTTTATTTTG ATCGGTTCGAT GGTATCCGAT CGACTGTTGT  
5161 TACAGCATTT GACGCAGGTT GCTAGATAAA CGACTAGACC GAATAATTTT TATTCCAACCT  
5221 ATTTTTGCAA CAAAAAAAAT CACAAAATAA TCAACCAATA AAACGATAAC TAACTTCTTG  
5281 CTACATCCGA TTAATTTTTT TCCAGCCTGC CAGAAAATCG CCCAAATATT GAAATATTGA  
5341 GGAAATTTTG GGCTGAAAAA AACATTAATT TTTTCGGCAA ACAAGCCAAC ACAGATTAAGC  
5401 AGAAAAAGTA AGAAAAAAG TTCCAGCCAA TTAAAAAATC GCCACGAAAG AGAAAAAAT  
5461 CGGTCAAAAT AAATCGAACT TGATTTCAAT TTCTAGCCCC CGAAGTCTTC GATAAACGGC  
5521 GCCATAAAAG GAACTACACG GTTTTCCGGT TGAGTACTTG CAAGCCCTAA CCCCTTAGAA  
5581 AAGCCGTCAT GATTAACAAC TGTTGTCGAC TTTTTTTTTGA TAAGTTAAGG GATGCAGTTT  
5641 ATGCACCCCT TAACCTATCA TTATTAGTGT AAACAAGGAA GGATATCTTG TACGGCTTGA  
5701 ACAATTACAC CACCAGCAGC GATATCAGCA GAAATACGAG CAATATGTTC GTCAAGTCCCT  
5761 TGTTCTGTTAT CGTTCCAAAT ATATGGCCGA TCTGATGTAG GTTTTTGGCC GACAACATGA  
5821 CGTACTGCTG AATAAAGACG TTCTGTAGCT GGACTTAAAC AAGCACGAGC ATCATAATGG  
5881 CCCGCTTTTT TGTAAGTCCG TAAATCAACA GCTTGTACTC CAAACATTAA TGCAATAGCT  
5941 ACGTAGTTTT GAAAAATATC AACAGACCGT CGTGCTAACG TAGCAGAAGT GTATCCTTGA  
6001 GAGTTAATAT TTTGGTTAAA TTGTTCCGGC TGTGTAGGAA AGCGATCAGC AATTGAATTT  
6061 CCGTAAAAAG TCAACAATGG CATAATTGAG TTGCCACAAA TTTGCCAAACC CTTAAGACCC  
6121 ATGTTTACCT TTCGTTCCCG GTTTCCCAAT AATGATGGTG GAAGTCCGTT ACTGAATTCT  
6181 GGA CTGGCCA AAAGTGCAAT TTGGACATCC AAATGCTTTG CAAGAAGACC AATGTAGTAA  
6241 CGTAAGTGGT CCATGCCCAT GCCAACATAT TGACCCAAAA AGTTACCGCC ATGGTATGAG  
6301 GCTTGGTTAT CAACGTCAAT TAATGGATTG TCAGTGACAC TATTAATTTT GATTTCAATT  
6361 TGCTTAGCAA TTTGTGAAAT TCCATCAACA ATAGGACCCA AATATTGTGG TAAGCAACGT  
6421 AAAC TATAGC GGTCTTGAAT AAGTTCATGA TCACGATAAT CATGCTTACC ATCTAATTCG  
6481 TCGCGAACAA GTTGA CTATT AGCTAAAAGA GAAATCATTT GATCAGCAGC CCAAAGTTGA  
6541 CCTGGGTGAG GTTTAGAATT GTGAATGAAT GGGTGGAAAC TTTGATTTGT GCCATTAAGT  
6601 GCTTGAATAT CTAAGGCATG AACACCCATG GCAATAGCAG TAAGAATTTG AGTATCATAA  
6661 ACGCAATTAG CAGCAATTCC CGTCATAACT GATGTACCAT TCATCATAGC AAGACCTTCT  
6721 TTTGGAAGTA ATGTAAGTGG TGATAAAATTT AATTGTTCGAA GAGCTGTTGG GGCATCCATT  
6781 TCTTTACCAT TAAAAACAAC TTTGAATGAT GGATCCAAAC CAATTAAGA ACCTGTAATA  
6841 TAAGATAAAG GAACAAGATC TCCACTTGCA CCAATTGATC CGAATTCGTA AACATAAGGT  
6901 GTAACACCGG CGTTAAGGAA AATTTCCATA CGCTTAATTA ATTCAAGACG AATACCAGAA  
6961 GCGCCACGCA TGTGTGAATT TGCACGTAAT AACATAGCAG CACGAACATC TGCTAATGGA  
7021 AGTTTATTAC CAGCTCCTGT TTTAAGAAAC CAAACAAGAT TAGTTTGAAG TTCAGAAGCT  
7081 TGTTACAGAC TAATAGCGAC GTTTGCCATT CCACCGAATC CTGAAGTAAC ACCATAAATT  
7141 GGTTCTCCTG ATTCAACAGC GTTATTGATA TAGTCGCAAC TAGCTTGAAT GCCTTGTA  
7201 ATGTCAGTGT TGTTAGTTAA ACTAACTAAA GTACCATTCG GTGCAACCCG TGCAACATCG  
7261 TTAATAGTAA GCTTTTGATT ACCAATGATA ACATTAGCAC TTGAGTTTCC AGTAAATGAG  
7321 AATTGTTGAG AACTAGTCTT AGATTGTGCT TGAGATAAAG TCTTCATTTA TACCTACTCC  
7381 TTCTTAATTA CAAATTTTTA GCATCTAATT TAAC TTCAAT TCCTATTATA CAAATTTTTA  
7441 AGATACTGCA CTATCAACAC ACTCTTGAAC ATATGCATCC TAGGTCTGCT ATTAATACTT  
7501 CCAGGAGTAT ACGTAGCCAG GCTAACGTTA ATCAACCAGG TATCCTCTAG AACTATAGCT  
7561 AGCATGCCTA TATATGGATC CAATTGCAAT GATCATCATG ACAGATCTGC GCGCATCGA  
7621 TATCAGCGCT TTAAATTTGC GCATGCTAGC TATAGTTCTA GAGGTACCGG TTGTTAACGT  
7681 TAGCCGGCTA CGTATACTCC GGAATATTAA TAGGCCTAGG ATGCATATGC TTAGAAGCAA  
7741 ACTTAAGAGT GTGTTGATAG TGCAGTATCT TAAAAATTTG TATAATAGGA ATTGAAGTTA  
7801 AATTAGATGC TAAAAATTTG TAATTAAGAA GGAGTGATTA CATGAACAAA AATATAAAAT

7861 ATTCTCAAAA CTTTTTAACG AGTGAAAAAG TACTCAACCA AATAATAAAA CAATTGAATT  
7921 TAAAAGAAAC CGATACCGTT TACGAAATTG GAACAGGTAA AGGGCATTTA ACGACGAAAC  
7981 TGGCTAAAAAT AAGTAAACAG GTAACGTCTA TTGAATTAGA CAGTCATCTA TTCAACTTAT  
8041 CGTCAGAAAA ATTA AAAACTG AATACTCGTG TCACTTTAAT TCACCAAGAT ATTCTACAGT  
8101 TTCAATTCCC TAACAAACAG AGGTATAAAA TTGTTGGGAG TATTCCTTAC CATTTAAGCA  
8161 CACAAATTAT TAAAAAAGTG GTTTTTGAAA GCCATGCGTC TGACATCTAT CTGATTGTTG  
8221 AAGAAGGATT CTACAAGCGT ACCTTGGATA TTCACCGAAC ACTAGGGTTG CTCTTGACAA  
8281 CTCAAGTCTC GATTCAGCAA TTGCTTAAGC TGCCAGCGGA ATGCTTTCAT CCTAAACCAA  
8341 AAGTAAACAG TGTCTTAATA AAACCTTACCC GCCATACCAC AGATGTTCCA GATAAATATT  
8401 GGAAGCTATA TACGTACTTT GTTTCAAAAT GGGTCAATCG AGAATATCGT CAACTGTTTA  
8461 CTAAAAATCA GTTTCATCAA GCAATGAAAC ACGCCAAAGT AAACAATTTA AGTACCGTTA  
8521 CTTATGAGCA AGTATTGTCT ATTTTTAATA GTTATCTATT ATTTAACGGG AGGAAATAAT  
8581 TCTATGAGTC GCTTTTGTA ATTTTGAAAAG TTACACGTTA CTAAAGGGAA TG TAGATAAA  
8641 TTATTAGGTA TACTACTGAC AGCTTCCAAG CATATGGCGG CCGCCTGCAG CTGGCGCCAT  
8701 CGATACGCGT ACGTCGCGAC CGCGGACATG TACAGAGCTC GAGAAGTACT AGTGGCCACG  
8761 TGGGCCGTGC ACCTTAAGCT TGGCGTAATC ATGGTCATAG CTGTTTCCTG TGTGAAATG  
8821 TTATCCGCTC ACAATTCCAC ACAACATACG AGCCGGAAGC ATAAAGTGTA AAGCCTGGGG  
8881 TGCCTAATGA GTGAGCTAAC TCACATTAAT TGC GTTGCGC TCACTGCCCG CTTTCCAGTC  
8941 GGGAAACCTG TCGTGCCAGC TGCATTAATG AATCGGCCAA CGCGCGGGGA GAGGCGGTTT  
9001 GCGTATTGGG CGC
