# Supplementary material for: Genetically engineered probiotic for the treatment of phenylketonuria (PKU); assessment of a novel treatment in vitro and in the PAHenu2 mouse model of PKU
Source: PubMed Central journal article supplement (PMC5435137; doi:10.1371/journal.pone.0176286), 2017-05-17

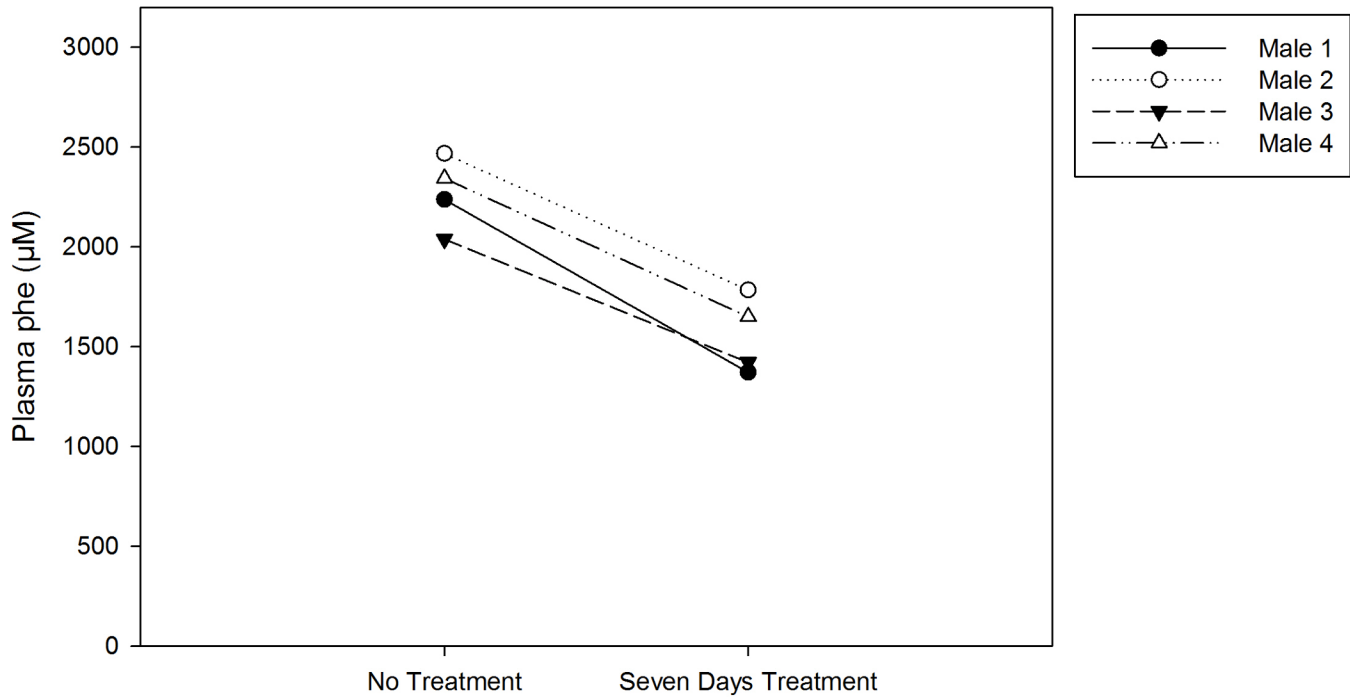

Supplement: pone.0176286.s002.pdf [file pone.0176286.s002.pdf]
